# Supplementary material
Source: ML conference proceedings conference paper supplement (https://proceedings.mlr.press/v139/bellot21a.html)
Supplement: Supplementary file 3 [file bellot21a-supp.zip]

Archive with 2 entries (2 files):
- pmlr_form.pdf
- Synthetic_Controls_ICML_app.pdf
